# Supplementary material for: Foot darkening with age in Spheniscus penguins: applications and functions
Source: PeerJ. 2024 Oct 21;12:e17937. doi: 10.7717/peerj.17937 (PMC11500702; doi:10.7717/peerj.17937)
Supplement: Supplemental Information 3 — Explanation of categorical data and corresponding numerical values for foot color. [file peerj-12-17937-s003.xlsx]

## Sheet: Sheet1
Variable name	Categorical value	Description	Numeric variable name	Numeric value
Species	PEAF	African Penguin	n/a	n/a
Species	PEGA	Galapagos Penguin	n/a	n/a
Species	PEHU	Humboldt Penguin	n/a	n/a
Species	PEMA	Magellanic Penguin	n/a	n/a
FootColor4	WHI	White	FootColNum	1
FootColor4	MIX	Mixed	FootColNum	2
FootColor4	BLW	Black & White	FootColNum	3
FootColor4	BLA	Mostly Black	FootColNum	4
AgeCode	0	Chick	n/a	n/a
AgeCode	1	Juvenile	n/a	n/a
AgeCode	2	Adult	n/a	n/a
